# Supplementary material for: Cost-effectiveness of Financial Incentives for Patients and Physicians to Manage Low-Density Lipoprotein Cholesterol Levels
Source: PubMed Central journal article supplement (PMC6324619; doi:10.1001/jamanetworkopen.2018.2008), 2018-09-14
Supplement: jamanetwopen-1-e182008-s001.pdf [file jamanetwopen-1-e182008-s001.pdf]

## Supplementary Online Content

Pandya A, Asch DA, Volpp KG, et al. Cost-effectiveness of financial incentives for patients and physicians to manage low-density lipoprotein cholesterol levels. *JAMA Netw Open*. 2018;1(5):e182008. doi:10.1001/jamanetworkopen.2018.2008

**eTable 1.** Disease Progression Inputs Used in the CVD PREDICT Model

**eTable 2.** Utilities Used in the CVD PREDICT Model

**eTable 3.** Costs (2017 US dollars) Used in the CVD PREDICT Model

**eTable 4.** Trial and Model Baseline Characteristics for Each Strategy (Treatment Arm)

**eFigure 1.** Two-Way Sensitivity Analysis Showing the ICER for the Shared Incentives Strategy Compared to the Trial Control for Different Combinations of LDL Reduction Waning and Years of Intervention Costs, Assuming a Cost-effectiveness Threshold of \$150,000/QALY

**eFigure 2.** One-Way Sensitivity Analysis Showing the ICER for the Shared Incentives Strategy as a Function of Analytical Time Horizon

**eFigure 3.** Two-Way Sensitivity Analysis Showing the ICER for the Shared Incentives Strategy Compared to the Trial Control for Different Combinations of LDL Cholesterol Reductions and Average Shared Financial Incentives Payouts

**eFigure 4.** Cost-effectiveness Acceptability Curve (CEAC) for the Probabilistic Sensitivity Analysis (PSA) for Scenario of 5-Year LDL Reduction Waning

**eFigure 5.** Cost-effectiveness Acceptability Curve (CEAC) for the Probabilistic Sensitivity Analysis (PSA) for Scenario of 10-Year LDL Reduction Waning and Including 5 Years of Intervention Costs

**eFigure 6.** Cost-effectiveness Acceptability Curve (CEAC) for the Probabilistic Sensitivity Analysis (PSA) for Scenario of 30-Year LDL Reduction Waning

**eFigure 7.** Cost-effectiveness Acceptability Curve (CEAC) for the Probabilistic Sensitivity Analysis (PSA) for Scenario of Lifetime LDL Benefit Duration

### **eReferences**

This supplementary material has been provided by the authors to give readers additional information about their work.



**eTable 1. Disease Progression Inputs Used in the CVD PREDICT Model**

| <b>Parameter</b>                                           | <b>Value</b>               | <b>Source</b>                                              |
|------------------------------------------------------------|----------------------------|------------------------------------------------------------|
| <b><i>From Disease Free State</i></b>                      |                            |                                                            |
| Non-CVD death                                              | Age and sex-specific table | NCHS 2010 <sup>1</sup>                                     |
| Stroke event                                               | Calibrated risk score      | Wolf 1991 <sup>2</sup>                                     |
| CHD event                                                  | Calibrated risk score      | Anderson 1991 <sup>3</sup>                                 |
| % CHD Cardiac Arrest                                       | Age and sex-specific table | Weinstein 1987 <sup>4</sup>                                |
| % CHD MI (male)                                            | 0.35                       | NHLBI 2006 <sup>5</sup>                                    |
| % CHD MI (female)                                          | 0.2                        | NHLBI 2006 <sup>5</sup>                                    |
| <b><i>From Stroke state</i></b>                            |                            |                                                            |
| Acute (1-year) risk of death                               | 0.15                       | Carandang 2006 <sup>6</sup>                                |
| Chronic (post 1 <sup>st</sup> -year) MI                    | 0.022                      | Touze 2005 <sup>7</sup>                                    |
| Chronic (post 1 <sup>st</sup> -year) stroke                | Calibrated risk score      | Wolf 1991 <sup>2</sup>                                     |
| <b><i>From MI state</i></b>                                |                            |                                                            |
| Acute (1-year) risk of death                               | 0.15                       | Mozaffarian 2016 <sup>8</sup>                              |
| Acute CABG                                                 | 0.082                      | Fang 2010 <sup>9</sup>                                     |
| Acute PTCA                                                 | 0.3                        | Fang 2010 <sup>9</sup>                                     |
| % Procedure death                                          | 0.0015                     | Williams 2006 <sup>10</sup>                                |
| Acute 2nd MI (no PTCA)                                     | 0.06                       | Capewell 2006 <sup>11</sup>                                |
| Acute 2nd MI (after PTCA)                                  | 0.053                      | Windecker 2014 <sup>12</sup>                               |
| Chronic (post 1 <sup>st</sup> -year) repeat MI             | 0.064                      | Jokhadar 2004 <sup>13</sup>                                |
| Chronic (post 1 <sup>st</sup> -year) repeat MI (with PTCA) | 0.052                      | Jokhadar 2004 <sup>13</sup> , Windecker 2014 <sup>12</sup> |

|                                                                |        |                                                             |
|----------------------------------------------------------------|--------|-------------------------------------------------------------|
| <b><i>From MI and CABG State</i></b>                           |        |                                                             |
| Acute post-CABG death                                          | 0.027  | Peterson 2004 <sup>14</sup>                                 |
| Acute 2nd MI                                                   | 0.047  | Windecker 2014 <sup>12</sup>                                |
| Repeat MI                                                      | 0.049  | Yusuf 1994 <sup>15</sup> , Windecker 2014 <sup>12</sup>     |
| <b><i>From Angina State</i></b>                                |        |                                                             |
| Acute (1-year) risk of death                                   | 0.045  | Capewell 2006 <sup>11</sup>                                 |
| Acute (1-year) risk of cardiac arrest                          | 0.006  | Hsia 2008 <sup>16</sup>                                     |
| Acute (1-year) risk of MI                                      | 0.035  | Hemingway 2003 <sup>17</sup>                                |
| Acute (1-year) risk of MI (with PTCA)                          | 0.031  | Hemingway 2003 <sup>17</sup> , Windecker 2014 <sup>12</sup> |
| Acute CABG                                                     | 0.2    | Ford 2007 <sup>18</sup>                                     |
| Acute PTCA                                                     | 0.3    | Ford 2007 <sup>18</sup>                                     |
| % Procedure Death                                              | 0.0015 | Assumption: same as MI                                      |
| Chronic (post 1 <sup>st</sup> -year) MI                        | 0.035  | Assumption: same as acute MI                                |
| Chronic (post 1 <sup>st</sup> -year) MI (with PTCA)            | 0.029  | Windecker 2014 <sup>12</sup>                                |
| <b><i>From Angina and CABG state</i></b>                       |        |                                                             |
| Acute post-CABG death                                          | 0.027  | Assumption: same as MI-CABG                                 |
| Acute 2nd MI                                                   | 0.028  | Windecker 2014 <sup>12</sup>                                |
| Chronic (post 1 <sup>st</sup> -year) MI                        | 0.0278 | Hemingway 2003 <sup>17</sup> ; Windecker 2014 <sup>12</sup> |
| <b><i>From Cardiac Arrest state</i></b>                        |        |                                                             |
| Acute (within 1 year) death                                    | 0.954  | Nichol 2008 <sup>19</sup>                                   |
| MI event                                                       | 0.064  | Assumption: same as MI                                      |
| <b><i>Chronic (post 1<sup>st</sup>-year) CVD Mortality</i></b> |        |                                                             |
| Proportion of chronic CVD deaths due to CVD                    | 0.28   | NHANES-based calculation                                    |
| Post-stroke all-cause mortality multiplier                     | 2.3    | Rosen 2010 <sup>20</sup>                                    |
| Post-CHD all-cause mortality multiplier (male)                 | 1.6    | Smolina 2012 <sup>21</sup>                                  |
| Post-CHD all-cause mortality multiplier                        | 2.1    | Smolina 2012 <sup>21</sup>                                  |

|                                                |     |                            |
|------------------------------------------------|-----|----------------------------|
| (female)                                       |     |                            |
| Post-CHD all-cause mortality >1 event (male)   | 3.4 | Smolina 2012 <sup>21</sup> |
| Post-CHD all-cause mortality >1 event (female) | 2.5 | Smolina 2012 <sup>21</sup> |

Note: see Pandya et al. 2017 for the full explanation of how these inputs were derived:

Pandya A, Sy S, Cho S, Alam S, Weinstein MC, Gaziano TA. Validation of a Cardiovascular Disease Policy Micro-simulation Model Using Both Survival and Receiver Operating Characteristic Curves. *Med Decis Making*. 2017 Oct;37(7):802-814.

**eTable 2. Utilities Used in the CVD PREDICT Model**

| <b>Parameter</b>                                                                        | <b>Base-case Value</b> | <b>Base-Case Source</b>                                 |
|-----------------------------------------------------------------------------------------|------------------------|---------------------------------------------------------|
| Disease Free                                                                            | 0.877                  | Sullivan 2006 (15), Mozafarran 2016 (3)                 |
| Chronic Cardiac Arrest                                                                  | 0.808                  | Sullivan 2006 <sup>22</sup> , Taylor 2009 <sup>23</sup> |
| Chronic MI                                                                              | 0.778                  | Sullivan 2006 <sup>22</sup>                             |
| Chronic MI with CABG                                                                    | 0.778                  | Sullivan 2006 <sup>22</sup>                             |
| Chronic Angina                                                                          | 0.768                  | Sullivan 2006 <sup>22</sup>                             |
| Chronic Angina with CABG                                                                | 0.768                  | Sullivan 2006 <sup>22</sup>                             |
| Chronic Stroke                                                                          | 0.768                  | Sullivan 2006 <sup>22</sup>                             |
| <i>Utilities for Acute Disease States (disabilities for acute state in parentheses)</i> |                        |                                                         |
| Acute Cardiac Arrest                                                                    | 0.770 (-0.0409)        | Sullivan 2006 <sup>22</sup>                             |
| Acute MI                                                                                | 0.737 (-0.0409)        | Sullivan 2006 <sup>22</sup>                             |
| Acute MI with CABG                                                                      | 0.737 (-0.0409)        | Sullivan 2006 <sup>22</sup>                             |
| Acute Angina                                                                            | 0.727 (-0.0412)        | Sullivan 2006 <sup>22</sup>                             |
| Acute Angina with CABG                                                                  | 0.727 (-0.0412)        | Sullivan 2006 <sup>22</sup>                             |
| Acute Stroke                                                                            | 0.716 (-0.0524)        | Sullivan 2006 <sup>22</sup>                             |
| <i>Disutilities for Events</i>                                                          |                        |                                                         |
| Repeat MI                                                                               | -0.041                 | Sullivan 2006 <sup>22</sup>                             |
| Repeat Stroke                                                                           | -0.052                 | Sullivan 2006 <sup>22</sup>                             |
| CABG                                                                                    | 0                      | assumption                                              |
| PTCA                                                                                    | 0                      | assumption                                              |
| Statin                                                                                  | -0.002                 | Gage 1996 <sup>24</sup> , Hutchins 2015 <sup>25</sup>   |
| Minor statin adverse event                                                              | -0.005                 | Lee 2010 <sup>26</sup> (2 days of life lost)            |

|                            |        |                                               |
|----------------------------|--------|-----------------------------------------------|
| Major statin adverse event | -0.038 | Lee 2010 <sup>26</sup> (2 weeks of life lost) |
|----------------------------|--------|-----------------------------------------------|

Note: see Pandya et al. 2017 for the full explanation of how these inputs were derived:

Pandya A, Sy S, Cho S, Alam S, Weinstein MC, Gaziano TA. Validation of a Cardiovascular Disease Policy Micro-simulation Model Using Both Survival and Receiver Operating Characteristic Curves. *Med Decis Making*. 2017 Oct;37(7):802-814.

**eTable 3. Costs (2017 US Dollars) Used in the CVD PREDICT Model**

| <b>Parameter</b>                                     | <b>Base-Case Value</b> | <b>Base-Case Source</b>                              |
|------------------------------------------------------|------------------------|------------------------------------------------------|
| <b><i>Costs for Chronic Disease States</i></b>       |                        |                                                      |
| Disease Free                                         | \$0                    | Assumption: None                                     |
| Chronic CHD                                          | \$3,368                | Lee 2010 <sup>26</sup>                               |
| Chronic Stroke                                       | \$2,225                | Pignone 2006 <sup>27</sup>                           |
| <b><i>Costs for Acute Disease States</i></b>         |                        |                                                      |
| Acute Cardiac Arrest                                 | \$20,277               | O'Sullivan 2011 <sup>28</sup>                        |
| Acute MI                                             | \$59,301               | O'Sullivan 2011 <sup>28</sup>                        |
| Acute Angina                                         | \$30,660               | O'Sullivan 2011 <sup>28</sup>                        |
| Acute Stroke                                         | \$20,127               | O'Sullivan 2011 <sup>28</sup>                        |
| <b><i>Costs for Procedures and Repeat Events</i></b> |                        |                                                      |
| Repeat MI                                            | \$59,301               | O'Sullivan 2011 <sup>28</sup>                        |
| Repeat Stroke                                        | \$20,127               | O'Sullivan 2011 <sup>28</sup>                        |
| CABG                                                 | \$38,797               | O'Sullivan 2011 <sup>28</sup>                        |
| PTCA                                                 | \$36,556               | O'Sullivan 2011 <sup>28</sup>                        |
| <b><i>Screening Costs</i></b>                        |                        |                                                      |
| Non-lab test (GP visit in Stage 1)                   | \$79                   | Pletcher 2009 <sup>29</sup>                          |
| Cholesterol (lab) test                               | \$37                   | Pletcher 2009 <sup>29</sup>                          |
| # extra GP visits during Stage 2                     | 1                      | Assumption                                           |
| # lab tests/year after treatment                     | 1                      | Lazar 2011 <sup>30</sup> , Expert Opinion            |
| # GP visits/year after treatment                     | 1                      | Lazar 2011 <sup>30</sup> , Expert Opinion            |
| <b><i>Statin Drug and Adverse Event Costs</i></b>    |                        |                                                      |
| Statin                                               | \$281                  | Redbook 2009 <sup>31</sup>                           |
| Anti-hypertensive                                    | \$217                  | Nuckols 2011 <sup>32</sup>                           |
| Aspirin                                              | \$8                    | Pignone 2006 <sup>27</sup>                           |
| ACE Inhibitor                                        | \$55                   | Shah 2011 <sup>33</sup> , Redbook 2009 <sup>31</sup> |



|                     |         |                                                      |
|---------------------|---------|------------------------------------------------------|
| Beta Blocker        | \$55    | Shah 2011 <sup>33</sup> , Redbook 2009 <sup>31</sup> |
| Mild adverse event  | \$188   | Lee 2010 <sup>26</sup>                               |
| Major adverse event | \$7,400 | Lee 2010 <sup>26</sup>                               |

Note: see Pandya et al. 2017 for the full explanation of how these inputs were derived:

Pandya A, Sy S, Cho S, Alam S, Weinstein MC, Gaziano TA. Validation of a Cardiovascular Disease Policy Micro-simulation Model Using Both Survival and Receiver Operating Characteristic Curves. *Med Decis Making*. 2017 Oct;37(7):802-814.

**eTable 4. Trial and Model Baseline Characteristics for Each Strategy (Treatment Arm)**

| <b>Characteristic</b>                   | <b>Trial</b> | <b>Model</b> |
|-----------------------------------------|--------------|--------------|
| n                                       | 1,503        | 1,000,000    |
| Age, mean (SD), years                   | 61.99 (8.7)  | 61.5 (11.9)  |
| Female sex (%)                          | 42.7         | 30.7         |
| African American (%)                    | 15.5         | 10.6         |
| Currently smoking (%)                   | *            | 31.8         |
| History of diabetes                     | 18.1         | 35.2         |
| Systolic blood pressure mean (SD), mmHg | 129.1 (14.9) | 136.6 (20.8) |
| Total cholesterol mean (SD), mg/dL      | *            | 228.5 (46.4) |
| LDL cholesterol mean (SD), mg/dL        | 160.6 (27.2) | 153.9 (39.3) |
| HDL cholesterol mean (SD), mg/dL        | *            | 44.3 (12.9)  |
| History of coronary heart disease (%)   | 34.5         | 7.7          |
| Taking cholesterol medication (%)       | 33.2         | 27.3         |
| CHD risk mean (SD)                      | 19.8 (8.7)   | 19.2 (8.4)   |

\*not included in trial dataset

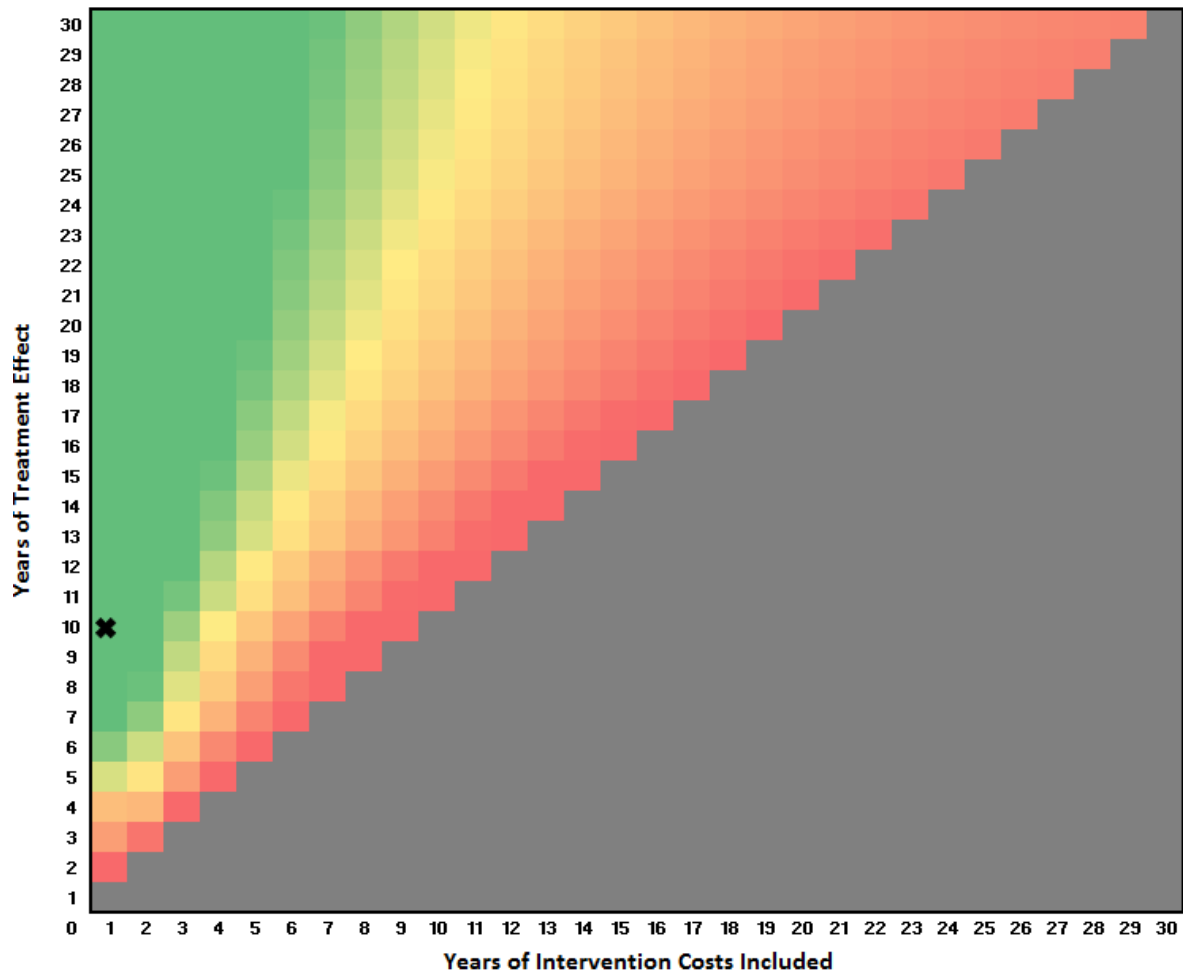

**eFigure 1. Two-Way Sensitivity Analysis Showing the ICER for the Shared Incentives Strategy Compared to the Trial Control for Different Combinations of LDL Reduction Waning and Years of Intervention Costs, Assuming a Cost-effectiveness Threshold of \$150,000/QALY.** The green regions show combinations of values that resulted in an ICER <\$100,000/QALY for the shared incentives strategy compared to the trial control strategy; yellow indicates an ICER of \$150,000/QALY, red indicates an ICER of >\$200,000/QALY; orange indicates an ICER between \$150,000-200,000/QALY; gray indicates implausible results (years where intervention costs are included but treatment effects are not observed in those years). “X” marks the base-case assumption and result (treatment effect linearly wanes to zero by year 10).

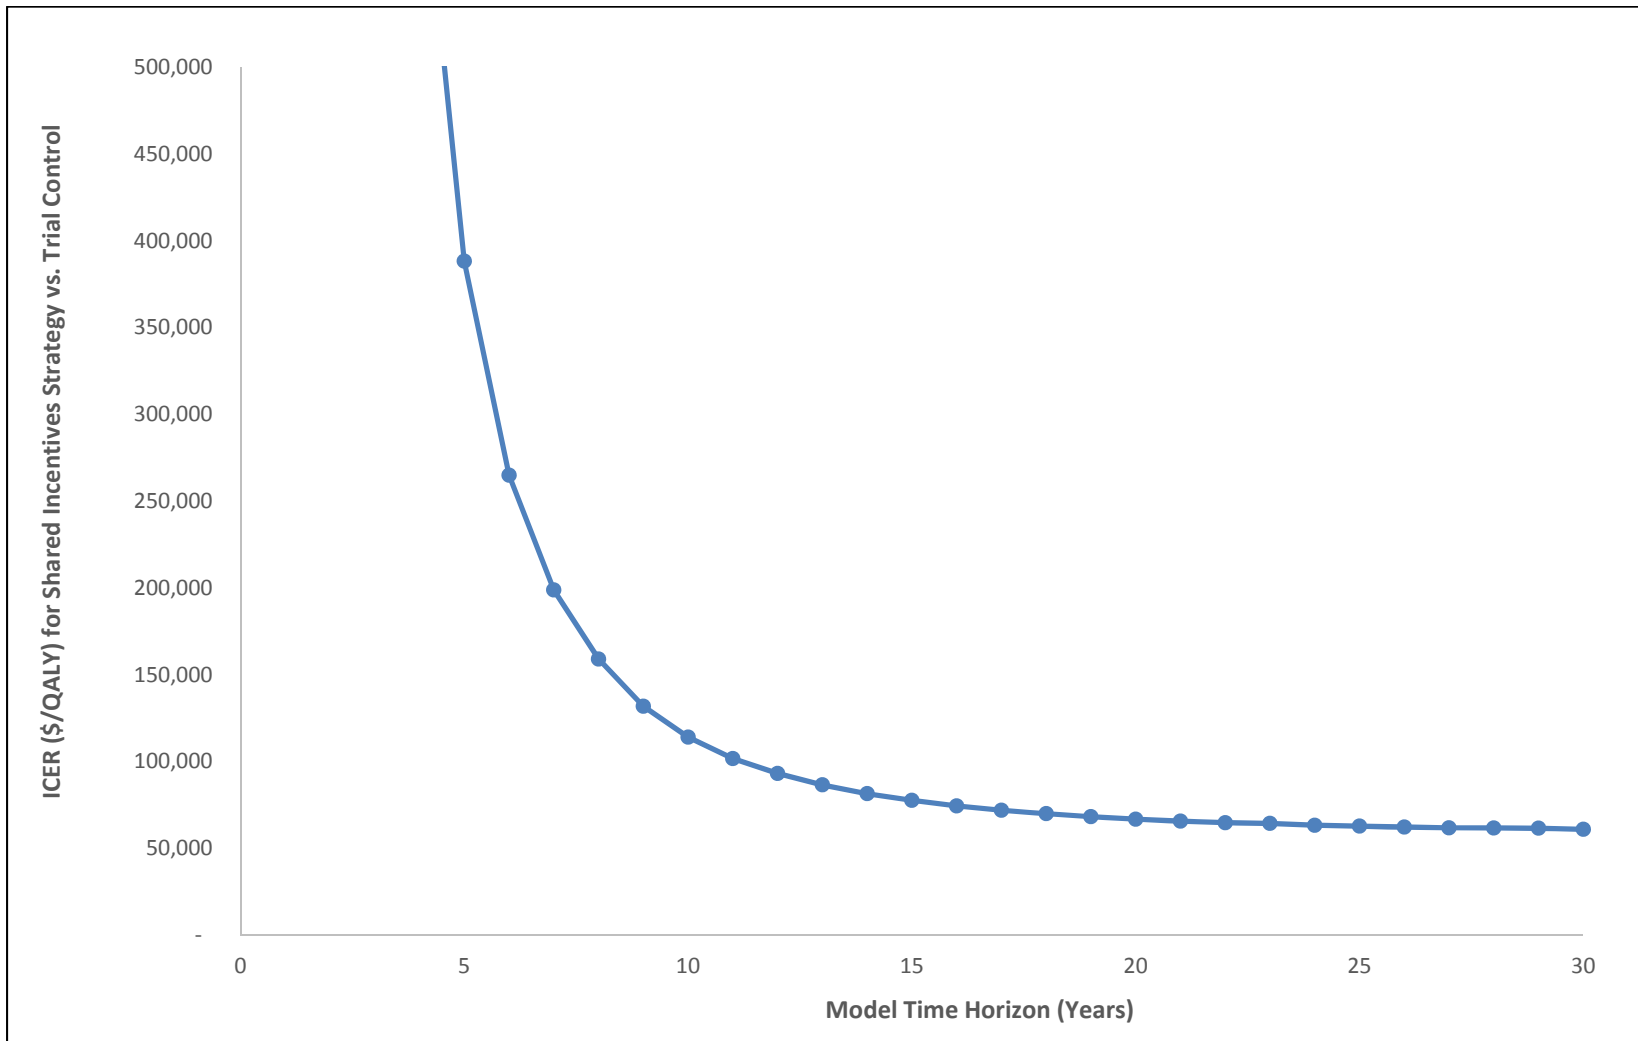

**eFigure 2. One-Way Sensitivity Analysis Showing the ICER for the Shared Incentives Strategy as a Function of Analytical Time Horizon.**

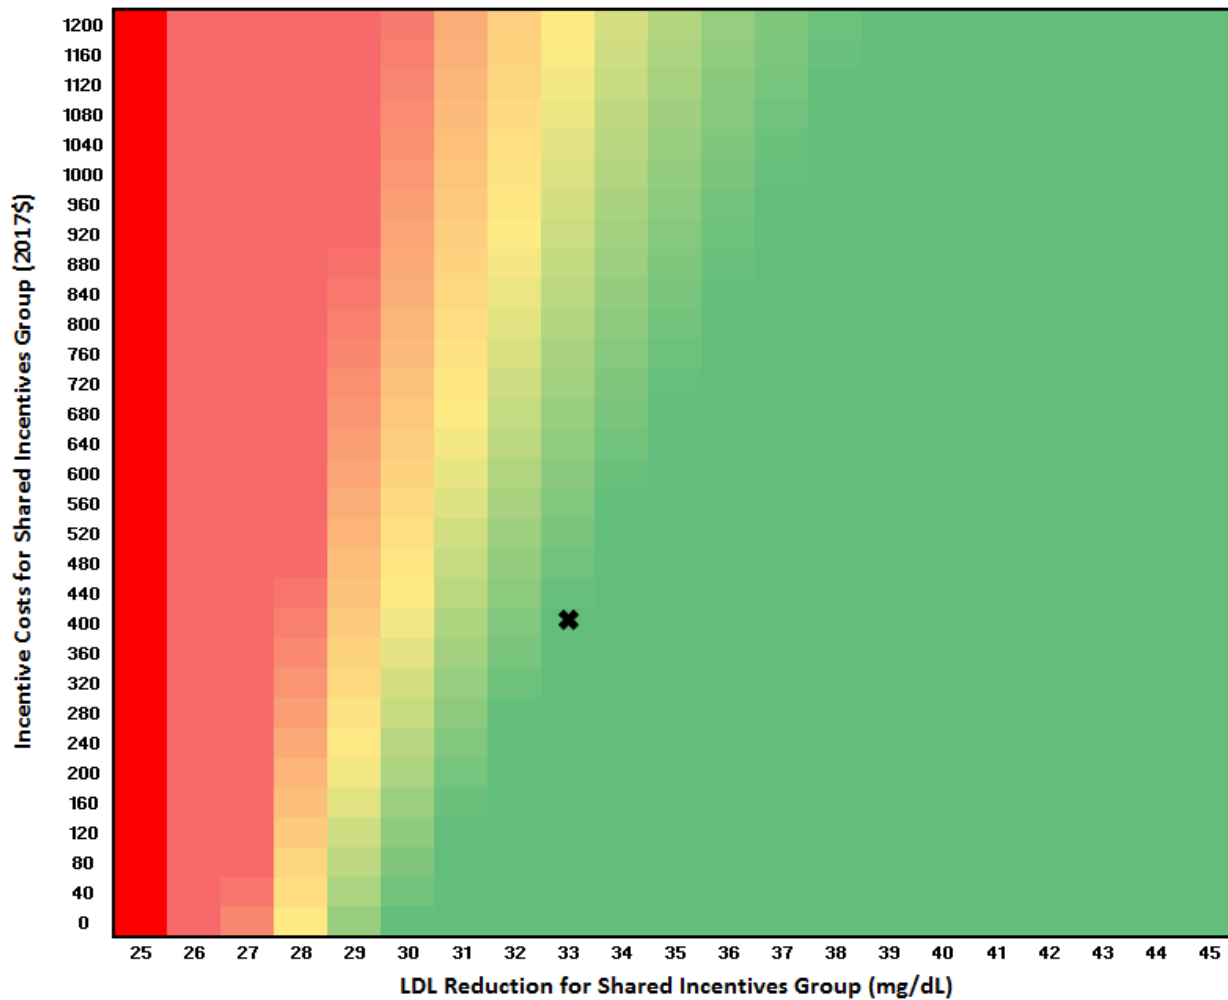

**eFigure 3. Two-Way Sensitivity Analysis Showing the ICER for the Shared Incentives Strategy Compared to the Trial Control for Different Combinations of LDL Cholesterol Reductions and Average Shared Financial Incentives Payouts.** The green regions show combinations of values that resulted in an ICER <\$50,000/QALY for the shared incentives strategy compared to the trial control strategy; yellow indicates an ICER of \$100,000/QALY, red indicates an ICER of >\$200,000/QALY; orange indicates an ICER between \$100,000-200,000/QALY; “X” marks the base-case assumption and result.

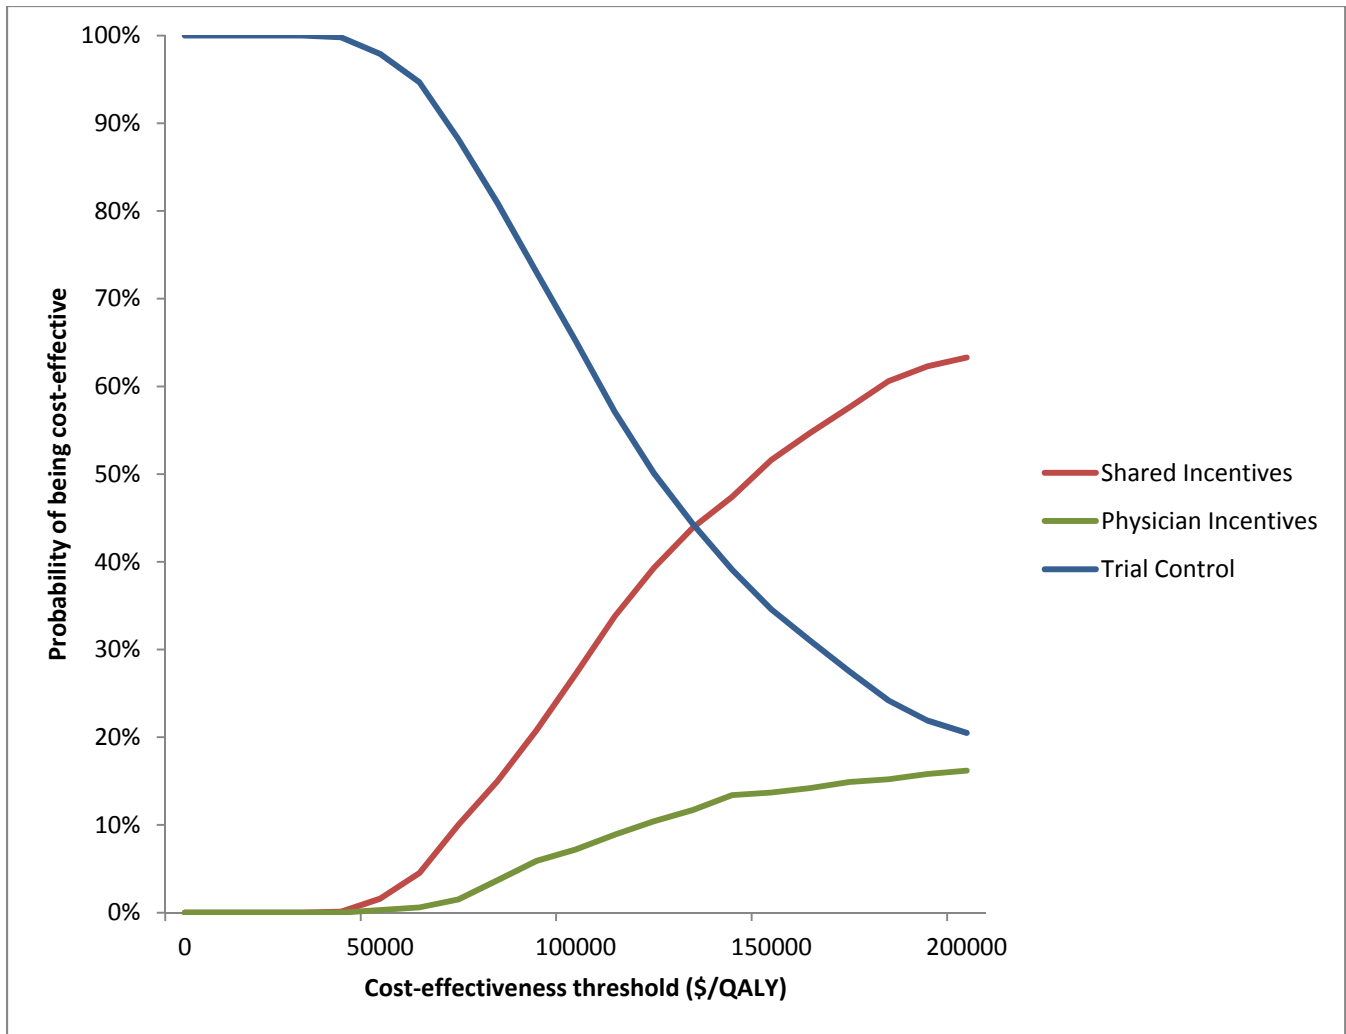

**eFigure 4. Cost-effectiveness Acceptability Curve (CEAC) for the Probabilistic Sensitivity Analysis (PSA) for Scenario of 5-Year LDL Reduction Waning.**

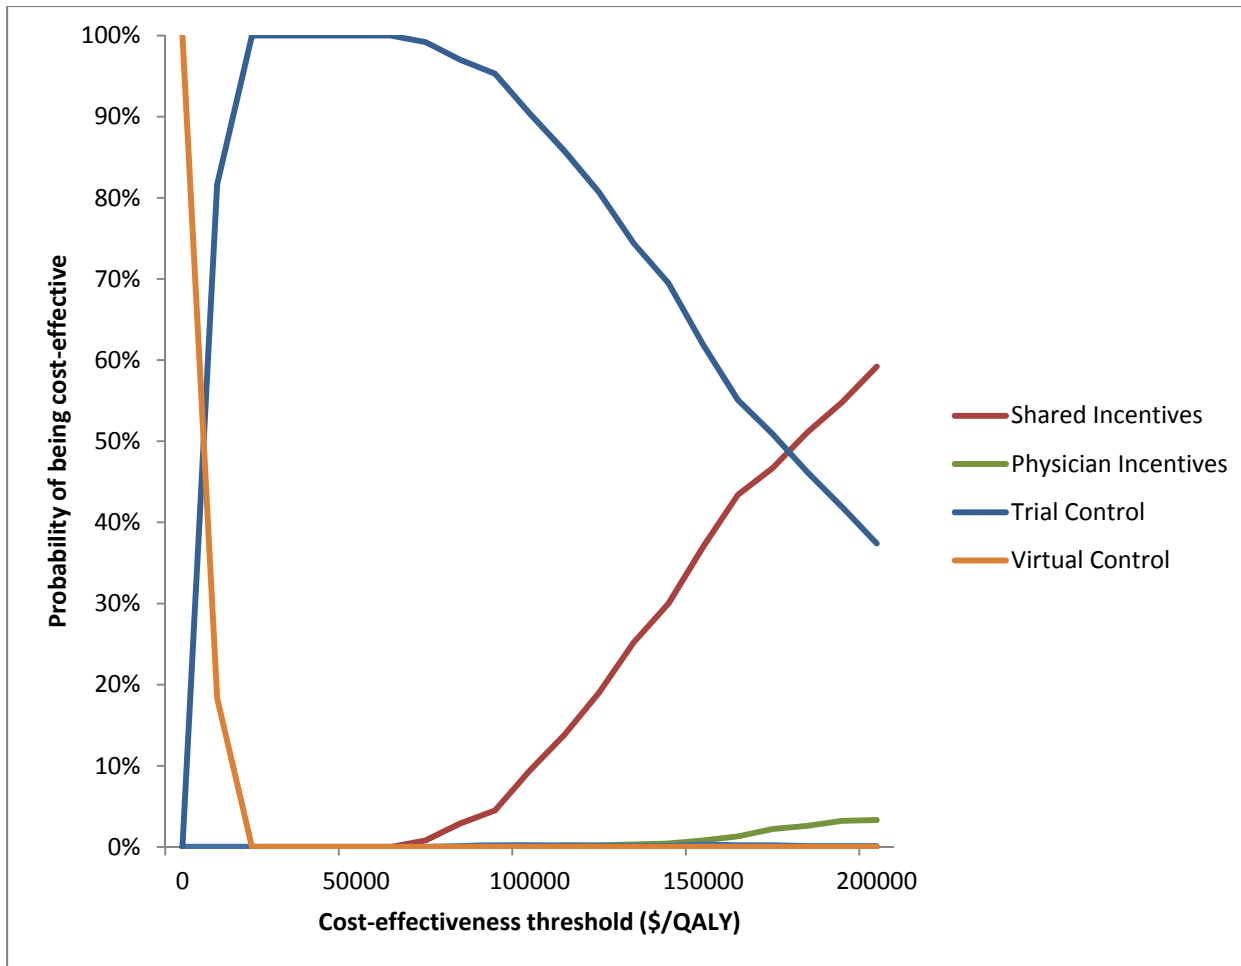

**eFigure 5. Cost-effectiveness Acceptability Curve (CEAC) for the Probabilistic Sensitivity Analysis (PSA) for Scenario of 10-Year LDL Reduction Waning and Including 5 Years of Intervention Costs.**

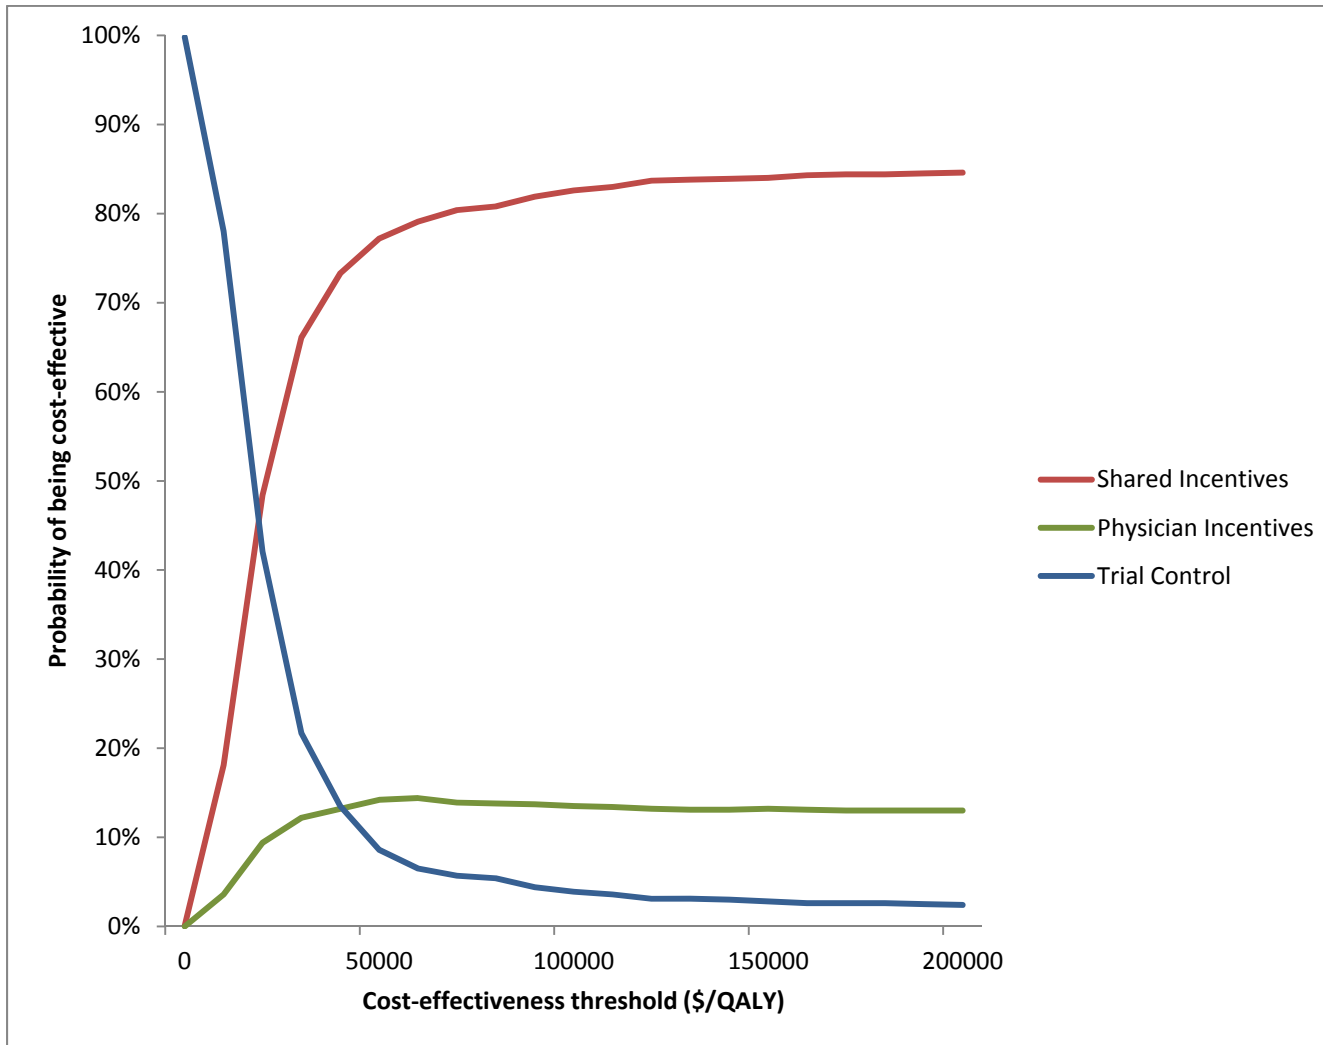

**eFigure 6. Cost-effectiveness Acceptability Curve (CEAC) for the Probabilistic Sensitivity Analysis (PSA) for Scenario of 30-Year LDL Reduction Waning**



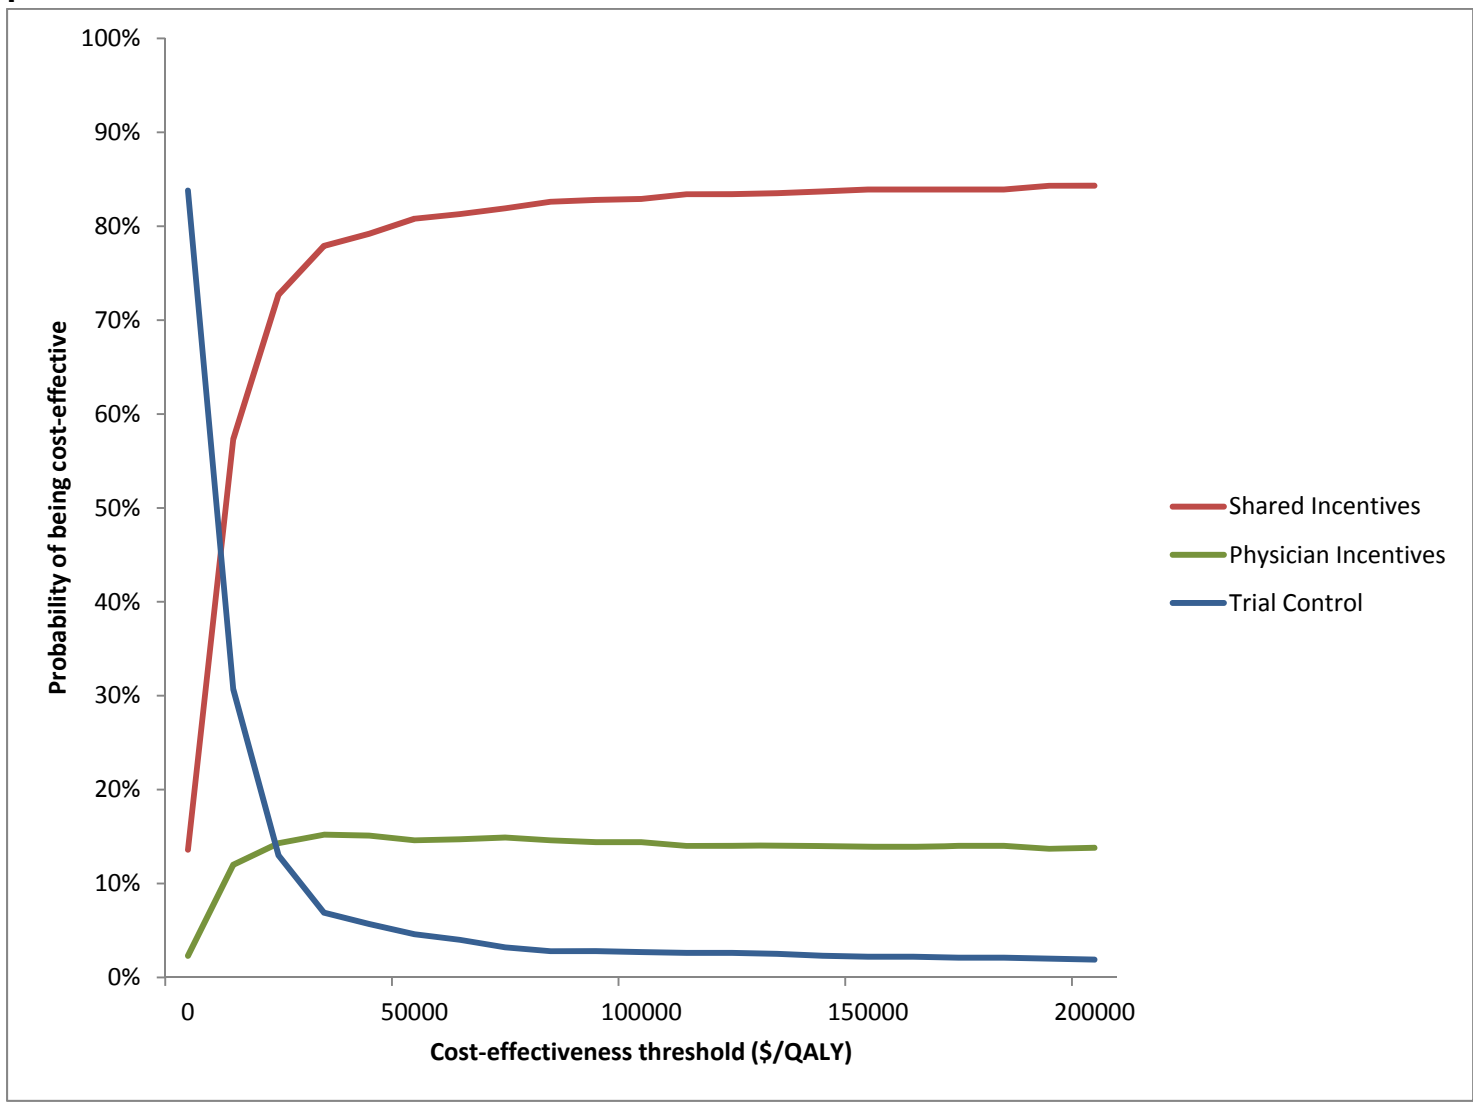

**eFigure 7. Cost-effectiveness Acceptability Curve (CEAC) for the Probabilistic Sensitivity Analysis (PSA) for Scenario of Lifetime LDL Benefit Duration.**

## eReferences

1. Heron M. *Deaths: Leading causes for 2006*. Hyattsville, MD: National Center for Health Statistics;2010.
2. Wolf PA, D'Agostino RB, Belanger AJ, Kannel WB. Probability of stroke: a risk profile from the Framingham Study. *Stroke*. Mar 1991;22(3):312-318.
3. Anderson KM, Odell PM, Wilson PW, Kannel WB. Cardiovascular disease risk profiles. *Am Heart J*. Jan 1991;121(1 Pt 2):293-298.
4. Weinstein MC, Coxson PG, Williams LW, Pass TM, Stason WB, Goldman L. Forecasting coronary heart disease incidence, mortality, and cost: the Coronary Heart Disease Policy Model. *American journal of public health*. Nov 1987;77(11):1417-1426.
5. National Heart Lung and Blood Institute. *Incidence and Prevalence: Chart Book on Cardiovascular and Lung Diseases*: National Institutes of Health;2006.
6. Carandang R, Seshadri S, Beiser A, et al. Trends in incidence, lifetime risk, severity, and 30-day mortality of stroke over the past 50 years. *Jama*. Dec 27 2006;296(24):2939-2946.
7. Touze E, Varenne O, Chatellier G, Peyrard S, Rothwell PM, Mas JL. Risk of myocardial infarction and vascular death after transient ischemic attack and ischemic stroke: a systematic review and meta-analysis. *Stroke; a journal of cerebral circulation*. Dec 2005;36(12):2748-2755.
8. Mozaffarian D, Benjamin EJ, Go AS, et al. Heart Disease and Stroke Statistics-2016 Update: A Report From the American Heart Association. *Circulation*. Jan 26 2016;133(4):e38-e360.
9. Fang J, Alderman MH, Keenan NL, Ayala C. Acute myocardial infarction hospitalization in the United States, 1979 to 2005. *Am J Med*. Mar 2010;123(3):259-266.
10. Williams DO, Abbott JD, Kip KE. Outcomes of 6906 Patients Undergoing Percutaneous Coronary Intervention in the Era of Drug-Eluting Stents. *Report of the DEScover Registry*. 2006;114(20):2154-2162.
11. Capewell S, Murphy NF, MacIntyre K, et al. Short-term and long-term outcomes in 133,429 emergency patients admitted with angina or myocardial infarction in Scotland, 1990-2000: population-based cohort study. *Heart*. Nov 2006;92(11):1563-1570.
12. Windecker S, Stortecky S, Stefanini GG, et al. Revascularisation versus medical treatment in patients with stable coronary artery disease: network meta-analysis. *BMJ : British Medical Journal*. 2014;348.
13. Jokhadar M, Jacobsen SJ, Reeder GS, Weston SA, Roger VL. Sudden death and recurrent ischemic events after myocardial infarction in the community. *American journal of epidemiology*. Jun 1 2004;159(11):1040-1046.
14. Peterson ED, Coombs LP, DeLong ER, Haan CK, Ferguson TB. Procedural volume as a marker of quality for CABG surgery. *JAMA : the journal of the American Medical Association*. Jan 14 2004;291(2):195-201.
15. Yusuf S, Zucker D, Peduzzi P, et al. Effect of coronary artery bypass graft surgery on survival: overview of 10-year results from randomised trials by the Coronary Artery Bypass Graft Surgery Trialists Collaboration. *Lancet*. Aug 27 1994;344(8922):563-570.
16. Hsia J, Jablonski KA, Rice MM, et al. Sudden cardiac death in patients with stable coronary artery disease and preserved left ventricular systolic function. *Am J Cardiol*. Feb 15 2008;101(4):457-461.
17. Hemingway H, Shipley M, Britton A, Page M, Macfarlane P, Marmot M. Prognosis of angina with and without a diagnosis: 11 year follow up in the Whitehall II prospective cohort study. *BMJ (Clinical research ed.)*. Oct 18 2003;327(7420):895.
18. Ford ES, Ajani UA, Croft JB, et al. Explaining the Decrease in U.S. Deaths from Coronary Disease, 1980-2000. *New England Journal of Medicine*. 2007;356(23):2388-2398.

19. Nichol G, Thomas E, Callaway CW, et al. Regional variation in out-of-hospital cardiac arrest incidence and outcome. *JAMA : the journal of the American Medical Association*. Sep 24 2008;300(12):1423-1431.
20. Rosen VM, Taylor DC, Parekh H, et al. Cost effectiveness of intensive lipid-lowering treatment for patients with congestive heart failure and coronary heart disease in the US. *Pharmacoeconomics*. 2010;28(1):47-60.
21. Smolina K, Wright FL, Rayner M, Goldacre MJ. Long-term survival and recurrence after acute myocardial infarction in England, 2004 to 2010. *Circ Cardiovasc Qual Outcomes*. Jul 1 2012;5(4):532-540.
22. Sullivan PW, Ghushchyan V. Preference-Based EQ-5D index scores for chronic conditions in the United States. *Med Decis Making*. Jul-Aug 2006;26(4):410-420.
23. Taylor DC, Pandya A, Thompson D, et al. Cost-effectiveness of intensive atorvastatin therapy in secondary cardiovascular prevention in the United Kingdom, Spain, and Germany, based on the Treating to New Targets study. *Eur J Health Econ*. Jul 2009;10(3):255-265.
24. Gage BF, Cardinalli AB, Owens DK. The effect of stroke and stroke prophylaxis with aspirin or warfarin on quality of life. *Arch Intern Med*. Sep 9 1996;156(16):1829-1836.
25. Hutchins R, Viera AJ, Sheridan SL, Pignone MP. Quantifying the utility of taking pills for cardiovascular prevention. *Circ Cardiovasc Qual Outcomes*. Mar 2015;8(2):155-163.
26. Lee KK, Cipriano LE, Owens DK, Go AS, Hlatky MA. Cost-effectiveness of using high-sensitivity C-reactive protein to identify intermediate- and low-cardiovascular-risk individuals for statin therapy. *Circulation*. Oct 12 2010;122(15):1478-1487.
27. Pignone M, Earnshaw S, Tice JA, Pletcher MJ. Aspirin, statins, or both drugs for the primary prevention of coronary heart disease events in men: a cost-utility analysis. *Ann Intern Med*. Mar 7 2006;144(5):326-336.
28. O'Sullivan AK, Rubin J, Nyambose J, Kuznik A, Cohen DJ, Thompson D. Cost estimation of cardiovascular disease events in the US. *Pharmacoeconomics*. Aug 2011;29(8):693-704.
29. Pletcher MJ, Lazar L, Bibbins-Domingo K, et al. Comparing impact and cost-effectiveness of primary prevention strategies for lipid-lowering. *Ann Intern Med*. Feb 17 2009;150(4):243-254.
30. Lazar LD, Pletcher MJ, Coxson PG, Bibbins-Domingo K, Goldman L. Cost-effectiveness of statin therapy for primary prevention in a low-cost statin era. *Circulation*. Jul 12 2011;124(2):146-153.
31. *Red Book*. Montvale (NJ): Thomson Helathcare Inc.; 2009.
32. Nuckols TK, Aledort JE, Adams J, et al. Cost implications of improving blood pressure management among U.S. adults. *Health services research*. Aug 2011;46(4):1124-1157.
33. Shah ND, Mason J, Kurt M, et al. Comparative Effectiveness of Guidelines for the Management of Hyperlipidemia and Hypertension for Type 2 Diabetes Patients. *PLoS ONE*.6(1):e16170.
